*Hospital-associated Viral Infection and the Anesthesiologist*

G. C. du Moulin, M.S., M.P.H.,\* and J. Hedley-Whyte, M.D.†

## CONTENTS

|                                                |
|------------------------------------------------|
| Hepatitis                                      |
| Preoperative Blood Screening                   |
| Personal Protective Measures                   |
| Prophylactic Immunization                      |
| Non-A/Non-B Form of Hepatitis                  |
| Herpesvirus                                    |
| Varicella                                      |
| Adenovirus                                     |
| Respiratory Syncytial Virus                    |
| Influenza                                      |
| Parainfluenza Viruses                          |
| Rhinovirus                                     |
| Rubella                                        |
| Creutzfeldt-Jakob Disease                      |
| Prevention of Viral Infection                  |
| Physical Environment of the Anesthesia Machine |
| Disinfection and Sterilization of Equipment    |
| Disposable Circuits and Filters                |
| Personal Protective Measures                   |

TRANSMISSION OF VIRUSES is a common event in hospitals.<sup>1,2</sup> Severity of infection can range from the isolated subclinical infection of a single patient to full-blown epidemics involving large segments of the hospital. Most known viruses have been implicated in nosocomial infections, including some of exotic origin.<sup>3</sup> Nosocomial infection resulting from viruses is probably responsible for more patient morbidity than nosocomial infection caused by bacteria, although substantiation of the true rate of nosocomial viral infection is incomplete. Infected anesthesia staff who have occupationally close contact to the mucous membranes of patients can serve as important links in the transmission of viruses between patients. By compromising immune defenses, anesthesia and surgery may worsen the course of viral illness.

Nosocomial viral infections can be differentiated

\* Associate in Anaesthesia.

† David S. Sheridan Professor of Anaesthesia and Respiratory Therapy.

Received from the Department of Anaesthesia, Harvard Medical School, at the Charles A. Dana Research Foundation, Beth Israel Hospital, Boston, Massachusetts. Accepted for publication January 11, 1983. Supported in part by the Anesthesia Research Center Grant GM 15904.

Address reprint requests to Mr. du Moulin: Department of Anaesthesia, 330 Brookline Avenue, Boston, Massachusetts 02215.

from bacterial infection by three main criteria.<sup>1</sup> First, nosocomial viral infections often reflect the prevalence of the virus in the community. These viruses are introduced into hospitals by patients and staff. Secondly, in contrast to bacterial infection, viral infections of the respiratory tract generally do not occur primarily in high-risk debilitated patients but in any patient. Finally, while much bacterial pneumonia is acquired from a patient's endogenous flora, for example, by the aspiration of gastric bacteria,<sup>4</sup> viral infections generally are acquired exogenously from staff and patients.

The extent of nosocomial viral infection is only just being learned. Hospital-acquired viral illness was estimated in 1978 by the Centers for Disease Control at 5,800 cases annually.<sup>2</sup> A recent and more complete analysis carried out at the University of Rochester determined that 5% of nosocomial infections at their institution are of viral origin.<sup>2</sup> Extrapolated nationwide, this translates into 75,000 infections annually. Even this figure is probably conservative because of a lack of definitive evidence of viral infection. Most hospitals still lack the diagnostic tools to identify specific viral infections. The more traditional collection of acute and convalescent sera is often not done unless there exists a specific interest to study a particular virus. The Rochester study revealed that 75% of nosocomial viral infections involve the respiratory tract. Infections acquired were caused by respiratory syncytial virus, parainfluenza virus, adenovirus, rotavirus, influenza virus, and rhinovirus.

In another study, 52% of patients admitted to a pediatric service acquired some form of viral illness during hospitalization, including rhinovirus, respiratory syncytial virus, parainfluenza, and influenza A and B.<sup>5</sup> In only 3% of the cases was virus spread from a roommate. Medical personnel and visitors were found to be most responsible for shedding virus. One direct by-product of viral infection is increased bacterial infection, particularly pneumonia.<sup>6</sup> In a study of 89 house officers who acquired a total of 82 viral respiratory tract infections during an 11-month period, airway colonization by *Staphylococcus aureus* present in 5-15% during illness-free periods increased to 43% during viral illness. Airway colonization with gram-negative bacilli increased from 12-18% to 60% when the house officers became

TABLE 1. General Characteristics of Viruses Important in Hospital Infections

| Virus                 | Family           | Genome | Diameter of Virion (nm) | Enveloped |
|-----------------------|------------------|--------|-------------------------|-----------|
| Hepatitis B           | ?                | DNA    | 44                      | °*        |
| Herpesvirus           | Herpetoviridae   | DNA    | 100-200                 | +         |
| Varicella             | Herpetoviridae   | DNA    | 100-200                 | +         |
| Adenovirus            | Adenoviridae     | DNA    | 70-90                   | °         |
| Influenza virus       | Orthomyxoviridae | RNA    | 80-120                  | +         |
| Respiratory syncytial | Paramyxoviridae  | RNA    | 150-300                 | +         |
| Parainfluenza         | Paramyxoviridae  | RNA    | 150-250                 | +         |
| Rubella               | Togaviridae      | RNA    | 50-75                   | +         |
| Rhinovirus            | Picornaviridae   | RNA    | 20-30                   | °         |
| Creutzfeldt-Jakob     | ?                | ?      | ?                       | ?         |

\* + = yes, ° = no.

ill. Virus infection of the respiratory tract predisposes to bacterial overgrowth with subsequent increase in morbidity.

We shall present the current state of knowledge of viral infections germane to the management and protection of the hospitalized patient and anesthesiologist. Consequently, we shall discuss hepatitis B virus, herpesvirus including varicella, respiratory syncytial virus, adenovirus, influenza/parainfluenza, rhinovirus, rubella, and Creutzfeldt-Jakob disease. A simplified classification scheme reviewing characteristics of these viruses is presented in table 1.

### Hepatitis

Viral hepatitis is subdivided into three forms: hepatitis A—epidemic or short-term incubation period hepatitis; hepatitis B—homologous serum or posttransfusion hepatitis; and a third form for which the term "hepatitis C" or "non-A/non-B hepatitis" has been proposed.<sup>7</sup> Hepatitis A virus is an infrequent cause of nosocomial infection. Anesthesiologists have never been implicated in transmission of this virus and are not at increased risk of hepatitis A infection. Hepatitis B, by contrast, is a common occupational hazard of anesthesiologists and other health care professionals,<sup>8-18</sup> and they may be responsible for transmission of hepatitis B virus to patients.<sup>12,19</sup>

The anesthesiologist should note that there are five nonparenteral routes of transmission of hepatitis B, as well as the parenteral route.<sup>6,20-24</sup> The nonparenteral routes are primarily, and most commonly, direct percutaneous inoculation by needle of contaminated serum or plasma or transfusion of infective blood or blood products. Less commonly, non-needle percutaneous transfer of infective serum or plasma can occur. The third most common route is introduction of infective serum or plasma onto mucosal surfaces. Introduction

of infective secretions other than serum or plasma onto mucosal surfaces can give rise to transmission, as can indirect transfer of infective serum or plasma via vectors or inanimate environmental surfaces. Airborne transmission still is the subject of controversy.<sup>20,25</sup>

The anesthesiologist needs to be concerned with self-inoculation, as well as with patient inoculation. Infected staff unknowingly can transmit hepatitis B surface antigen to patients. This is especially important in light of the fact that one can be an asymptomatic carrier of hepatitis B surface antigen.<sup>9,10,15,22,26-30</sup> The carrier state is defined as persistence of hepatitis B surface antigen for more than 6 months, and this state may be lifelong. The incidence rate of such carriers varies in different populations with a range of 0.1-20%.<sup>26</sup> It has been reported that 5-50% of persons infected with hepatitis B virus become chronic carriers.<sup>27,30,31</sup> The carrier's blood, and possibly other body fluids, maintain the infectivity for hepatitis B virus. The ability of hepatitis B virus to contaminate the environment further emphasizes the necessity for concern by anesthesiologists.<sup>32</sup>

Hepatitis B is a disease that has been shown to be transmitted by oral surgeons to patients.<sup>33,34</sup> An oral surgeon who was an asymptomatic carrier of hepatitis B surface antigen infected 71 patients, although no hepatitis B surface antigen was found in the dentist's secretions and there were no overt breaks in aseptic technique. The oral surgeon had not worn gloves, and he admitted to finger cuts while working in the oral cavity.<sup>34</sup> After having taken 7 months convalescence for hepatitis infection, an oral surgeon was still able to transmit the disease to his patient.<sup>33</sup>

Many analogies can be drawn between anesthesiologists and oral surgeons; however, there have been no studies examining hepatitis transmission in the practice of anesthesiology. One can only conclude that the anesthesiologist should make every effort to prevent the acquisition of hepatitis B. In the reverse situation during a recent outbreak of hepatitis B, an anesthesiologist was infected during operation on a bisexual drug addict who had been admitted to the hospital in an unconscious state. The surgeon, the operating room supervisor, and his intensive care unit nurse also contracted hepatitis B.<sup>35</sup>

A limited number of studies have looked at the exposure of physicians to hepatitis B virus.<sup>8,15</sup> In one study, a total of 1,192 physicians at three consecutive annual meetings of the American Medical Association (AMA) were tested for the presence of hepatitis B surface antibody, an indicator of prior exposure.<sup>8</sup> Overall, 18.5% of physicians showed evidence of exposure. Surgeons had the highest frequency with 28% and anesthesiologists had 17%. These figures should be compared with

a 4% positive exposure rate in physicians involved in nonpatient care activities. In a recent study from Germany, both hepatitis B surface antigen and hepatitis B surface antibody were measured in a population of 3,770 hospital personnel.<sup>15</sup> Physicians as a group had a frequency of exposure of 18%, similar to that obtained in the AMA study. However, when exposure rates to hepatitis were examined by departments, those of dialysis and anesthesiology were highest at 31%. The rate of German anesthesiologists may be double the AMA meeting attendees' rate because the Germans anesthetize twice as many patients per year as anesthesiologists who attend the American Medical Association meeting. One-quarter of German surgeons exhibited evidence of exposure to either antigen or antibody. Personnel from non-patient-care disciplines had a 7.6% exposure frequency.<sup>15</sup>

Two facts of anesthetic practice possibly can explain the high rate of exposure. Anesthesiologists as a group are in direct physical contact with the oral cavities of many more patients than other medical specialties. For example, the anesthesiologist may administer anesthesia to an average of five patients a day. Surgeons, on the other hand, perform an average of one procedure a day. Therefore, in 10 years of practice, while surgeons may have carried out procedures on 2,500 patients, anesthesiologists may have had exposure to 12,500 patients, a five times greater risk of exposure.

A second factor is that the anesthesiologist rarely isolates himself from his patient with the same rigor as his surgical counterpart. Direct contact with the patient is frequent and sustained. Human contact or human products constitute the major sources of viral infection. In many cases, the patient may not exhibit symptoms. Certain groups of patients, however, should be regarded as possible carriers. These groups have been identified as follows<sup>36</sup>: all patients with liver disease, however acute or chronic; patients undergoing hemodialysis, or who have had a renal transplant; all patients with leukemia, lymphoreticuloses, polyarteritis nodosa, or polymyositis; patients being treated with radiotherapy or immunosuppressive drugs; immigrants or visitors from countries with a high background of carriers; persons who have been transfused in, or recently returned from countries with a high background incidence (namely, tropical and subtropical areas and Greenland); patients who have received blood or a blood product in the last 6 months or who have been transfused with blood or blood products from paid blood donors; inmates of prisons or institutions for the mentally defective; drug addicts; prostitutes; homosexuals; and persons who have been tattooed.

The hepatitis viral particle exhibits physical characteristics that encourage long-term survival. This virus

can survive for 4 hours at 60° C and at room temperature for 6 months. It is resistant to phenol and chlorine-containing disinfectants. Heat or steam sterilization is best for both inactivating the virus and destroying its antigenicity. Hepatitis B surface antigen has been recovered from stainless steel surfaces, cotton swabs, dialysis unit panels, needles, needle clippers, and gloves.<sup>20-24</sup> In one study, the exposure of hepatitis B surface antigen positive blood to stainless steel surfaces and cotton swabs at 25° C and 42% relative humidity, for 72 hours, resulted in only a 15-20% loss of antigenic activity; after 14 days, antigenic activity was reduced by another 15-20%.<sup>32</sup> Recovery of hepatitis B antigen from the stainless steel, using the swab-rinse technique, was 100% effective. In the same study, no reduction of hepatitis B surface antigen was detected with six contaminated cotton swabs that had been in the mail for 7 days. These experiments demonstrate that much of the equipment and the instruments used by the anesthesiologist are potential fomites for hepatitis B virus.

The most frequently reported source of infection is contact with contaminated blood, although one study concludes that saliva is probably the main vehicle of infection in nonparenterally acquired type B hepatitis.<sup>24</sup> Urine and feces are not significant vehicles of transmission of hepatitis B virus.

With the prevalence of hepatitis B, its many modes of spread, and ease of transmission, active preventive measures are extremely important. The facets of prevention encompass preoperative blood-screening policies, environmental sterilization, prophylactic immunization, and adherence to sterile procedure and garb.

#### PREOPERATIVE BLOOD SCREENING

Reducing the incidence of nosocomial hepatitis B virus would be a much easier task if the identity of hepatitis B virus carriers were known. Until recently, blood testing was limited to the detection of hepatitis B surface antigen as indication of infection. The most sensitive of tests, however, identified only about 50% of the units of blood that would transmit hepatitis B virus to patients.<sup>35</sup> However, recent discoveries regarding the structure of hepatitis B virus and other associated antigen-antibody reactions have made hepatitis B screening much more reliable. Tests now can detect hepatitis B surface antigen, antibody to hepatitis B virus, the "e" antigen, and deoxyribonucleic acid polymerase activity, all markers of hepatitis B virus infectivity during the different stages of infection. In particular, the discovery of the hepatitis B core antigen and its antibody have led to the development of more reliable blood testing. This is because of the sequence of appearance of the antibodies; both antibody to hepatitis B virus and antibody

TABLE 2. Serologic Methods for Detecting Inapparent Hepatitis B Virus Infection<sup>10,16,17,21,22,28,30</sup>

| Serologic Marker* | When Detected after Exposure | General Characteristics                                                                                                                             |
|-------------------|------------------------------|-----------------------------------------------------------------------------------------------------------------------------------------------------|
| HBsAg             | 18-84 days                   | Persists 14-148 days; identifies only 50% of blood units capable of transmitting HBV; in chronic HBV infection persistence is greater than 6 months |
| Anti-HBs          | >165 days                    | May be produced in low concentration throughout acute stages of hepatitis B<br>Not detected in chronic HBV infection                                |
| HBcAg             | 18-84 days                   | Transiently detected                                                                                                                                |
| Anti-HBc          | 60-150 days                  | High titer during onset, persists in decreasing titer for many years, true marker for HBV infection                                                 |
| DNA polymerase    | 18-84 days                   | Transiently detected                                                                                                                                |
| e Antigen         | 18-84 days                   | Detected in individuals with circulating HBsAg and anti-HBs                                                                                         |

\* HBsAg = Hepatitis B surface antigen; anti-HBs = antibody to HBsAg. HBcAg = Hepatitis B core antigen; anti-HBc = antibody to HBcAg. Anti-e = antibody to e antigen; HBV = Hepatitis B virus.

to hepatitis B core antigen serve as markers of infectivity but are not always present at the same time. The available serological tests for hepatitis B virus infectivity are presented in table 2.

Examining blood for elevated levels of serum transaminase, as proposed in 1959, has not proved to be efficacious. Transaminase testing yields too many false-positive results; in addition, an elevated alanine aminotransferase level is not specific for viral hepatitis but can result from numerous other conditions.<sup>37</sup>

The most promising approach is serotyping for the presence of antibody to the core antigen in addition to the traditional serotyping for surface antigen and antibody. Antibody to the core antigen is a good indicator of hepatitis B virus infectivity without having the problems associated with using "e" antigen, hepatitis B deoxyribonucleic acid polymerase, or transaminase as markers.

#### PERSONAL PROTECTIVE MEASURES

Personal measures for the anesthesiologist uniformly include the wearing of disposable gloves, gown, and mask. Because many cases of hepatitis follow accidental inoculation, blood spills, and punctured gloves, needle sticks should be treated seriously with proper reporting, examination, and treatment in employee health service, and timely follow-up.

Preoperative serotyping should be done on high-risk patients, checking for both hepatitis B surface antigen and antibody to core antigen. This "double screening" reveals both subclinical states, the prodromal period, and the symptomless chronic carrier. The patient whose results are negative for surface antigen, positive for antibody to core antigen, and negative for antibody to surface antigen should be treated as a hepatitis B carrier.<sup>41</sup>

#### PROPHYLACTIC IMMUNIZATION

Protection with immune serum globulin after known inoculation has been successful and more recently hepatitis B immune globulin has been used.<sup>42-45</sup> In a study done to determine the efficacy of each in preventing hepatitis B after known exposure to hepatitis B virus, hepatitis B immune globulin was significantly more effective than immune serum globulin in reducing the incidence of both overt type B hepatitis and of type B infection. This suggests that the hepatitis B immune globulin blunts the effect of introduced hepatitis B surface antigen sufficiently to prevent active immunization.<sup>44</sup> In another study, immune serum globulin was shown to afford partial protection against type B hepatitis.<sup>42</sup> Immune serum globulin also was demonstrated to be superior to hepatitis B immune globulin in producing passive-active immunity and therefore is of potentially greater benefit in protecting persons working in high-risk environments.<sup>36</sup> The ratio of overt disease to subclinical infection was the same in hepatitis B immune globulin recipients as it was in the immune serum globulin recipients. Thus, the achievement of a higher frequency of passive-activity immunity in immune serum globulin recipients was at the price of a higher frequency of overt Type B hepatitis. This hardly permits the designation of immune serum globulin as an effective prophylactic agent against Type B hepatitis.<sup>36</sup> On the basis of work done by Seeff and others, it is quite apparent that hepatitis B immune globulin is superior to immune serum globulin as a prophylactic agent for type B hepatitis following known exposure to hepatitis B virus.<sup>43</sup>

There are no definite contraindications to the use of immune serum globulin or hepatitis B immune globulin, and they both appear to be safe for use in pregnant women.<sup>43</sup> Because of the possibility of causing immune-complex disease, hepatitis B virus carriers should not be given hepatitis B immune globulin.<sup>43</sup> Adverse reactions to immune serum globulin are uncommon when it is administered by the recommended intramuscular or subcutaneous routes.<sup>43</sup>

The most recent advance in the prevention of hepatitis B is the development of the vaccine, the use of

which looks promising.<sup>40,45,46</sup> Our hospital took part in a high-risk-staff immunization program, including surgical staff, anesthesiologists, laboratory personnel, and hemodialysis staff.

The hepatitis B vaccine is made using hepatitis B surface antigen harvested from chronic carriers by plasmapheresis. The acceptance of the vaccine has been slowed by concern regarding the possibility that the vaccine could be one of the unknown routes for the transmission of acquired immune deficiency syndrome. The vaccine is given in a series of three injections: two at an interval of a month and a booster shot at 6 months. It is estimated that the vaccine will protect a person for approximately 5 years at a cost of \$110. In precicensure trials, there were no statistical differences between the side effects from the vaccine and from a placebo.<sup>46</sup>

Based on the known properties of hepatitis and the recent advances in hepatitis B prophylactic measures, guidelines can be established for anesthesiologists, and adherence to such should eliminate the nosocomial hepatitis B virus infections transmitted between anesthesiologist and patient (table 3).

#### Non-A/Non-B Form of Hepatitis

The non-A/non-B form remains enigmatic; its clinical features resemble those of hepatitis B and it occurs most frequently after blood transfusions, but it also occurs after accidental needle sticks and close contact with a carrier. Diagnosis of non-A/non-B by serotyping is not yet possible, and so the diagnosis of non-A/non-B is made through a process of exclusion.<sup>10,28,37</sup>

#### Herpesvirus

Herpes simplex virus is a common infectious agent of humans.<sup>48</sup> While acquisition of initial infection is usually oral, breaks in the mucous membrane or skin serve as a portal of entry. The virus remains with the individual throughout life in a dormant form residing in the sensory ganglia that innervate the site of primary infection.<sup>48</sup> Various stimuli will reactivate the virus, which will reappear near the site of original infection or track along the nerves to remote sites. Because neutralizing antibody already is present, a four-fold antibody rise usually is not demonstrated during reactivation.

A wide range of nosocomially acquired herpesvirus infections has been reported, including herpetic infection of the digits (whitlow), herpes neonatorum, whitlow with encephalitic symptoms, acute gingivostomatitis, and acute diphtheria-like membranous pharyngitis.<sup>49,50</sup> Both herpes simplex type I virus and type II have been implicated in these infections, and herpetic whitlows

TABLE 3. Guidelines for Hepatitis B Prophylaxis an Alternative to Hepatitis B Vaccination

|                             |                                                                                                                                                                                                                                                                                                      |
|-----------------------------|------------------------------------------------------------------------------------------------------------------------------------------------------------------------------------------------------------------------------------------------------------------------------------------------------|
| I. Routine Serotesting      | a) Seronegative personnel screen every 2-3 months for HBsAg* and Anti-HBs<br>b) Anti-HBs positive personnel: test annually for anti-HBs and to confirm continued immunity<br>c) HBsAg positive personnel: test quarterly for antigen and anti-HBs when they become seronegative                      |
| II. Exposure to Hepatitis B | a) report accident to employee health service<br>b) serologic testing of patient and employee for HBsAg<br>c) Hepatitis B immunoglobulin administered only after type of exposure has been well documented and patient is antigenemic (administer within 7 days of exposure, preferably 24-48 hours) |

\* HBsAg = hepatitis B surface antigen; anti-HBs = antibody to HBsAg (Werdegar D: Employee health. Nurs Clin N Am 15(4):769-787, 1980).

resulting from type II can contaminate and subsequently infect the genital area. Transmission has occurred from patients to staff and *vice versa*. Anesthesiologists are particularly susceptible to herpetic whitlow because of sustained direct contact with oral, tracheal, and pharyngeal secretions. Despite the extremely painful situation, with paronycheal or pulp involvement, it has been stressed that treatment should not include surgical intervention.<sup>50</sup> Attempts at draining cause the iatrogenic entrance of virus into the deep pulp space, often leading to serious complications such as secondary bacterial infections. Because this condition is self-limiting, infected anesthesiologists must refrain from dealing with the chronically ill, debilitated, or immunosuppressed patient until the lesions have evolved into the dry and crusting stage.

Recently, herpes type I virus has been found in the tracheobronchial secretions in 14 of 46 patients having adult respiratory distress syndrome.<sup>51</sup> The control group which had been intubated and on ventilators but had no acute adult respiratory distress syndrome, were found to have negative test results for type I herpes simplex virus. This association has not been seen before. Additionally, mortality in the acute adult respiratory distress syndrome group was significantly higher in those patients having no antibody titer rise as compared with those with a large titer rise. At postmortem examination, type I herpes simplex virus was found in the vagal ganglia, and the possibility exists that infection of

the respiratory tract occurs secondarily to vagal ganglionitis.

Vidarabine (adenine arabinoside), a nucleoside derivative originally developed as an anticancer agent, is now being used to treat herpes.<sup>52,53</sup> Clinical trials of this drug in groups of immunocompromised patients with zoster, patients with herpes simplex encephalitis, and in cases of neonatal herpes simplex infection have shown much improvement, including reduced mortality.<sup>53</sup> Topical preparations are available and have been successfully used in corneal ulcers resulting from herpes; however, topical vidarabine has not proved useful in labial or genital forms of herpes infections.<sup>52</sup>

Acyclovir is another antiviral drug gaining increasing acceptance.<sup>54-56</sup> This drug has been used successfully in clinical trials to treat mucocutaneous herpes simplex virus infection after marrow transplantation. It has been shown to be a potent inhibitor of type I and II herpes simplex virus replication.<sup>57</sup>

Treatment with the new generation of antiviral drugs such as acyclovir, vidarabine, and transfer factor may decrease the morbidity of these patients. At present, development of successful vaccination against human herpesviruses is unlikely.

#### VARICELLA

Another of the members of the family, *Herpesviridae* is the varicella-zoster virus.<sup>58</sup> The route of infection differs from herpes simplex in that the upper respiratory tract mucosa usually is the involved area. While most anesthesiologists have had childhood varicella, there may be some individuals that are not immune. The complication rate occurring with adult varicella disease is much higher than the childhood disease. Varicella pneumonia occurs in 2-30% of adult cases.

The most extensive epidemiologic study of nosocomial varicella infection took place at another hospital on the Harvard Medical School campus.<sup>59</sup> The index patient, a 3-year-old child who had transverse myelitis had chicken pox develop. After 8 days of intensive care, she died of varicella pneumonia. Subsequent to her death, chicken pox occurred in 13 children and two adults. Airborne transmission of droplet nuclei was implicated strongly after analysis of airflow patterns using sulfuric acid smoke puffs, oil of wintergreen, and sulfur hexafluoride. It was determined that airflow from the index patient's room was mixed with hallway air supply in ducts and was transmitted to other patient rooms. In addition, high vacuum air conduits were faulty.

#### Adenovirus

Adenoviruses derive their name from the fact that they were first isolated from adenoid tissues and they

have an affinity for lymph glands where they may remain dormant for years. There are about 30 serotypes of adenoviruses. In addition to the adenoids, adenoviruses invade the respiratory tract, the gastrointestinal tract, and the conjunctiva.

Most adenovirus infections occur in children or in certain semiclosed populations like military recruits.<sup>60,61</sup> There are three commonly seen syndromes associated with adenoviruses. Febrile acute respiratory disease (ARD), characterized by sore throat and cough, is seen in approximately 5-10% of United States military recruits.<sup>61,62</sup> This syndrome is seen only sporadically in civilian populations.<sup>63</sup> Pharyngoconjunctival fever is a syndrome characterized by pharyngitis, conjunctivitis, and fever that usually affects children and young adults. Epidemic keratoconjunctivitis often is an iatrogenic disease spread via ophthalmologic instruments, ointments, and contaminated fingers.<sup>64-66</sup>

The anesthesiologist should be aware that there have been outbreaks of pharyngoconjunctival fever and keratoconjunctivitis reported among hospital personnel.<sup>64,67,68</sup> In one case, abandonment of isolation procedures may have led to the outbreak,<sup>69</sup> while in another<sup>67</sup> a contaminated ophthalmic solution caused the outbreak. When working with patients known to have adenoviral disease, simple measures such as frequent handwashing and use of gloves should lessen such iatrogenic morbidity to patients and staff.

#### Respiratory Syncytial Virus

Respiratory syncytial virus belongs to the family *paramyxoviridae* and constitutes one of three genera, the others causing measles (*morbillivirus*) and mumps (*paramyxovirus*). Its name is derived from the multinucleated giant cells observed in serially propagated human cell cultures (syncytial effect). It is the agent most responsible for infant pneumonia and bronchiolitis.

There have been numerous reports of large hospital outbreaks of respiratory syncytial virus in pediatric wards, as well as in newborn and pediatric intensive care units.<sup>70-76</sup> Attack rates vary widely. Hall observed a rate of 119 cross-infections in infants per million susceptible days per infective day.<sup>73</sup> Other studies using the same epidemiologic terminology have obtained rates as low as 32 cross-infections per million susceptible days per infective day.<sup>72</sup> The nosocomial spread of respiratory syncytial virus also is dependent upon the design of the ward. Cross-infection was considerably higher in wards that lacked isolettes that were physically separate from one another.<sup>73</sup> Another factor was age. Younger children and infants were more susceptible to infection. Hall is emphatic about the role the staff plays in transmission. In her study, 10 of 24 staff members (42%)

acquired respiratory syncytial virus infection.<sup>73</sup> In a later study, 56% of staff members became infected, with 82% showing symptoms of respiratory syncytial virus. Among those infected were 25 nurses, 10 physicians, and eight medical students.<sup>70</sup>

It has been hard to demonstrate long-term viability of viruses in aerosols or contaminated fomites. Hospital personnel act as transmitters of infection to children by carrying contaminated secretions on their hands and clothes.<sup>77</sup>

Methods of control include the isolation of infected infants; adherence to strict handwashing, gowning, and gloving; and, where possible, the temporary assignment of staff into either clean or infected areas. Anesthesiologists have not been implicated as yet in the transmission of respiratory syncytial virus.

### Influenza

Influenza strikes both staff members and patients during seasons when the disease is present in the community.<sup>75,78-82</sup> The most important reservoir of viral particles is the nasopharyngeal secretions of infected persons.<sup>83</sup> Thus, the anesthesiologist can have frequent contact and be responsible for spread of influenza among the surgical population. In addition, infected staff with subclinical infection can transmit the virus directly to susceptible patients. Of course, patients can acquire influenza from patients newly admitted with influenza, patients who develop nosocomial influenza, and visitors.

Influenzal disease may lead to increased tracheo-bronchial colonization with bacteria. Airway colonization with these organisms frequently results in pneumonia. Studies are now indicating that influenza causes extensive damage to the tracheobronchial tree, particularly to the mucosal surfaces.<sup>84</sup> The resulting desquamation of the upper airway exposes basement membrane surfaces that selectively adsorb gram-negative organisms such as *Pseudomonas aeruginosa*. The increased bacterial load, together with an impaired mucociliary transport system, promotes colonization. The presence of an endotracheal tube allows contaminated secretions to pool on the surface of the cuff.<sup>85</sup> In this situation, pneumonia is likely.

The risk of influenza to patients is reduced by vaccinating the staff. Studies have indicated that less virus is shed in the nasal secretions of vaccinated personnel.<sup>83</sup> In 1976, Guillain-Barré syndrome appeared in excess frequency among persons who had received the A/New Jersey/76 swine influenza vaccine. There were 10 excess cases for every million persons vaccinated. In subsequent vaccination programs, the incidence of Guillain-Barré syndrome is not significantly higher than in the

unvaccinated population.<sup>86</sup> The other form of protection is the prophylactic use of the drug amantadine hydrochloride. This drug is indicated only for influenza A. Use of amantidine has shown an 80% reduction in attack rate with prophylactic use.<sup>57</sup> In addition, patients with uncomplicated influenza not requiring hospitalization for other reasons should not be admitted.

### Parainfluenza Viruses

The parainfluenza viruses are exceeded only by respiratory syncytial virus as important causes of lower respiratory disease in young children.<sup>87,88</sup> To a much lesser extent, they also may produce upper respiratory illness in older children and adults resulting from reinfection. There are four known parainfluenza virus types. Types 1 and 2 are the principle cause of croup (laryngotracheobronchitis) in children,<sup>89,90</sup> Type 3 is second only to respiratory syncytial virus as a cause of pneumonia and bronchiolitis in infants younger than 6 months of age.<sup>87,88</sup> Type 4 is a frequently isolated and relatively innocuous strain.<sup>91</sup>

The parainfluenza viruses possess a high degree of infectiousness. Transmission of parainfluenza viruses occurs by direct person-to-person contact or by large droplet spread. In some studies<sup>92,93</sup> approximately 90% of children have antibodies to the Type 3 virus. Others have shown that about 50% of children possessed antibodies to Type 1 and 2 viruses.<sup>94</sup> Although the parainfluenza viruses infect a large segment of the population, Types 1 and 2 rarely produce serious disease.<sup>95,96</sup> However, Type 3 is a significant cause of respiratory disease, especially pneumonia and bronchiolitis, that primarily affects infants in their first months of life.<sup>87,88</sup> Because of the mode of transmission, medical personnel appear to have a low probability of cross-infecting other patients unless they are infected with parainfluenza.

### Rhinovirus

Ellis has addressed the relationship of anesthesia to the common cold.<sup>97</sup> He postulated that under most conditions, the patient who has mild upper respiratory tract infection should not be prevented from having a surgical procedure including general anesthesia. The exceptions might be patients who will be subjected to abdominal or hernia procedures who might put the incision at risk by coughing; however, anesthetic and surgical management should be modified to lessen the risks of coughing. Of course, the conservative approach is to postpone the operation until the illness and its symptoms have been resolved. The perioperative and postoperative course of children presenting for myringotomy and typanostomy who had upper respiratory viral infection at time of operation was investigated re-

cently.<sup>98</sup> Cohorts of similar patients with either no evidence of viral infection or questionable evidence were included. In the first 73 patients, all of whom had halothane/O<sub>2</sub>/N<sub>2</sub>O administered by face mask, there were no complications seen after operation in any patients regardless of the presence of uncomplicated upper respiratory infection. It would seem that general anesthesia for minor operation need not be postponed if the patient has an uncomplicated upper respiratory infection and if endotracheal intubation is not considered necessary. In influenza-infected ferrets, anesthesia with halothane, diethyl ether, or pentobarbital did not seem to increase the severity of disease. These findings are based on criteria including temperature increase, lethargy, rhinorrhea, and tissue abnormalities upon necropsy.<sup>99</sup> In infected ferrets who had enflurane anesthesia, increased histopathologic changes were observed.

Rhinovirus can be easily transmitted.<sup>100-102</sup> In these studies, rhinovirus, which causes one-third or more of adult common colds, is not transmitted by the airborne route but rather by inoculation from contaminated environmental surfaces or from the skin of infected individuals. In only two of 25 infected persons was virus expelled in a cough or sneeze.<sup>101</sup> Virus was more likely to be found on the skin. Rhinovirus survives well on inanimate materials such as formica, stainless steel, nylon, and dacron. In more recent studies, rhinovirus infection could be transmitted by hand-to-hand contact significantly more effectively than small or large particle aerosols, a convincing argument against indiscriminate hand-shaking.<sup>100</sup> Rhinovirus infection could be effectively interrupted by application of 2% aqueous iodine to the tips of the fingers.<sup>103</sup> The effectiveness of inhibition lasted up to 2 hours. Anesthesiologists who have colds might use this method, although the cosmetic properties of 2% iodine discourage one against doing this.

With regard to seasonal prevalence, anesthesiologists can expect to see increased numbers of patients who have upper respiratory tract and airway infections resulting from the adenoviruses, respiratory syncytial viruses, influenza, parainfluenza, and rhinoviruses beginning in the late autumn and lasting until early spring. Epidemics resulting from these viruses will occur during these colder seasons.

### Rubella

The teratogenic complications of rubella are well known. Transmission of this 60 nm ribonucleic acid virus is accomplished via the airborne route, and the virus manifests itself as a posterior auricular and suboccipital lymphadenopathy in susceptible individuals. Much subclinical infection also occurs. Transmission of

rubella virus from hospital personnel to patients and vice versa is an unfortunate situation and has been reported in the literature as large-scale outbreaks that result in much lost work time and tremendous expense in both searching out susceptible individuals and instituting mass immunization programs.<sup>104-108</sup>

While rubella infection in obstetric-gynecologic personnel may have serious consequences to their pregnant patients, anesthesiologists can readily participate in the chain of transmission. Seventy per cent of individuals in the United States that contract rubella are 15 years or older. This includes women of child-bearing age, 20% of whom probably are susceptible.<sup>109</sup>

The prevention of rubella epidemics seems straightforward enough until the hospital health service tries to implement the program. The first step, of course, is to determine in all employees, male and female, who is susceptible. Those found susceptible are urged to become vaccinated. The vaccine, available since 1969, is a live rubella virus vaccine prepared in human diploid cell culture. It is provided as a monovalent, divalent (measles-rubella), or trivalent (measles, mumps, and rubella) vaccine.<sup>109</sup> Immunity acquired as a result of vaccination is probably lifelong. Side effects and adverse reactions are minimal. In most reports describing nosocomial rubella outbreaks and the resulting vaccination program, compliance ranges from high to low, the low compliance rate being consistently the physician population,<sup>108,110</sup> whose failure to implement disease-preventing behavior probably is related to lack of perceived vulnerability and the press of other priorities. This is unacceptable when pregnant women constitute the patient population. Since 1979, our institution requires new employees and physicians to provide written assurance of rubella immunization.

### Creutzfeldt-Jakob Disease

Creutzfeldt-Jakob disease is a subacute degenerative disease of the central nervous system typified by progressive pre-senile dementia.<sup>111-114</sup> The incubation period in the three probably iatrogenically transmitted cases have been as short as 17-18 months.<sup>115,116</sup> There is no known treatment. Creutzfeldt-Jakob disease almost always leads to death within 6 months of onset. The disease is caused by a transmissible virus that is membrane associated, has unusual resistance to physical and chemical means of inactivation, and has not been shown to induce any detectable immune reaction.<sup>117</sup> Although it is not a common disease, it also is not exceedingly rare. There are, for example, more cases of Creutzfeldt-Jakob disease in the world than there are cases of rabies. A genetic factor related to susceptibility cannot be discounted.



Experiments designed to study the modes of transmission have been limited, of course, to nonhuman primates, where transmission has been accomplished by several routes.<sup>118</sup> Of concern to the anesthesiologist is the fact that the disease was transmitted successfully through the oral route using infected brain. There have been only two reported instances of nosocomial infection. One involved a patient who had a corneal transplant.<sup>116</sup> The second involved two patients who underwent procedures using contaminated stereotactic electrodes.<sup>115</sup> In our institution, a ward secretary and a nurse received needle puncture injuries from an uncapped syringe containing material aspirated from a cranial fluid collection of a patient known to have Creutzfeldt-Jakob disease. After 2 years, neither shows signs of the disease.

Anesthesiologists should be aware that contact with blood, cerebrospinal fluid, and nervous tissues might increase the risk of transmission. The risk is slight, but to take care during brain biopsies for dementia is prudent because a firm clinical diagnosis of the subacute spongiform encephalopathies is difficult to establish. In 308 patients with Creutzfeldt-Jakob disease studied by Gadjusek, 18 were in health-related professions, including two physicians, one pediatric neurosurgeon, four dental surgeons, and seven nurses.<sup>112</sup> To date, the disease has not been reported in any pathologist, anesthesiologist, mortician, or morgue attendant.

Contaminated material has been adequately disinfected with 0.5% sodium hypochlorite (10% chlorox) as well as steam and ethylene oxide sterilization.<sup>119,120</sup> Before linen and instruments known to be contaminated leave the operating room, they should be soaked in 1% sodium hypochlorite and properly bagged and labeled. Two hundred and sixty-nanometer ultraviolet irradiation, ionizing radiation, 3–10% formalin, and 70% ethanol fail to inactivate Creutzfeldt-Jakob disease virus. The disease, although not prevalent, is nearly always fatal. Adequate precautions should be taken by anesthesiologists, but because it is a disease of low contagion, anesthesiologists should not hesitate to give anesthesia to patients in whom the disease is suspected.

There is no evidence of hospital-associated transmission of the other slow virus diseases of humans including subacute sclerosing panencephalitis, caused by measles virus, and progressive multifocal leukoencephalopathy, caused by papova JC virus. In addition, the association of multiple sclerosis, amyotrophic lateral sclerosis, and Alzheimer's disease with a viral cause is under investigation.

### Prevention of Viral Infection

The prevention and control of viral infection has been reviewed recently.<sup>121,122</sup> We shall address specifi-

cally prevention of viral infection and specific guidelines for the protection of anesthesiologists and their patients. The importance of prevention is underscored by the fact that infection by many viruses is enhanced by the stresses imposed by surgery and anesthesia. While the exact mechanisms remain to be elucidated, there is general agreement that there is inhibition of phagocytic mobilization with subsequent depression of phagocytosis in the presence of anesthetics.<sup>123-126</sup> Reduction in antibody-producing cells in the presence of halothane, nitrous oxide, and pentobarbital has been observed.<sup>45</sup> Would this generalized depression of immunologic responsiveness exacerbate infections in patients harboring viruses or acquiring viruses during hospitalization? The limited work carried out so far seems to indicate that increased susceptibility is virus dependent, anesthetic dependent, and dose dependent.

Moudgil studied mice infected with the murine hepatitis virus by intraperitoneal infection and exposed groups to 1.5% halothane or oxygen for 2 hours.<sup>127</sup> The anesthetized groups had a statistically higher mortality when compared with the unanesthetized groups. Moreover, the LD<sub>50</sub> was reduced by a factor of 10 in the halothane-treated groups. In another study, by contrast, exposure of virally infected mice and dogs to diethyl ether lessened the severity of disease.<sup>128,129</sup>

The most extensive *in vitro* studies on the effects of anesthesia on viral infection continue to be carried out by Knight et al.<sup>130-134</sup> His initial studies dealt with the single-stranded ribonucleic acid paramyxovirus responsible for measles.<sup>133</sup> In this study, cells of a continuous primate cell line were exposed to different concentrations of halothane: 0, 0.8, 1.2, 1.4, and 1.5% for various times up to 72 hours. A dramatic reduction in virus titer upon exposure to halothane was demonstrated. The reduction increased as the halothane concentration increased. There were no observable effects in terms of toxicity on the cell cultures themselves. At 1.5 and 1.8% halothane there was no virus replication. A decrease of viral-specific cytopathogenic effects also was seen. Furthermore, antiviral activity ceased when the halothane was removed.

To begin to elucidate the point in the virus life cycle where halothane exerts its effect, Knight's group examined viral adsorption to cells. Viral adsorption did occur during the presence of the anesthetic. Further investigation of the effects halothane had on the synthesis of viral nucleocapsids showed that inhibition did occur. Inhibition corresponded to reduction in infectivity. Tritiated uridine incorporation into the nucleocapsid was completely inhibited by 1.8% halothane. Synthesis was reinstated again when the anesthetic was removed, although defective virus particles possessing a smaller amount of genomic material were present.<sup>130</sup>

The effect of halothane on virus protein and ribonucleic acid synthesis was investigated with use of virus specific immunofluorescent antisera. At halothane concentrations of 1.8%, measles virus-specific antigen was not synthesized. Viral ribonucleic acid synthesis also was found to be inhibited. Thus, the dramatic interference of halothane on the life cycle of this one virus seemed to indicate that inhibitory effects are exerted after viral adsorption but before ribonucleic acid synthesis.

Knight recently expanded his investigations to include other viruses including poliovirus and herpesvirus. The replication of this latter virus also was inhibited.<sup>132</sup> Poliovirus and influenza A virus replication were unaffected by 2% halothane. Furthermore, investigation of other anesthetics, including enflurane and isoflurane, have shown a dose-dependent and reversible inhibition of measles virus replication as well as increased survival in influenza-infected mice.<sup>134</sup>

Most recently this group has been able to show that viruslike particles released from halothane-treated herpes simplex virus-infected cells were found to be devoid of deoxyribonucleic acid.<sup>131</sup> The finding of defective virus particles is important in that they have been shown to be possible etiologic agents for chronic central nervous system infections such as subacute sclerosing panencephalitis.<sup>135-137</sup> However, we know of no evidence that panencephalitis is more common in patients who have undergone surgery and anesthesia.

#### PHYSICAL ENVIRONMENT OF THE ANESTHESIA MACHINE

No study has been undertaken to determine the fate that befalls viral particles expelled into the environment of the anesthesia machine. The physical properties of humidity, dessication, and temperature all affect virus survival. The effects of anesthetics on virus replication already have been addressed. Some pertinent extrapolation probably can be made on the basis of work carried on outside the field of anesthesiology.

In general, viruses do not survive in nature for prolonged periods of time outside a viable host. However, viral particles can remain viable on inanimate surfaces for a surprising period of time. This has already been discussed with regard to hepatitis B and the rhinoviruses.<sup>29,32,101</sup> Influenza virus will probably remain viable for 24 hours within an anesthesia circuit, although viability will depend upon humidity.<sup>138</sup> In this case, the lower the relative humidity, the greater the survival. Viruses deposited in anesthesia machines are subject to dessication and will undergo inactivation over time. Viruses exposed to temperatures normally associated with anesthesia probably will not become significantly less viable. In studies done with rhinoviruses, it was found that relatively few particles are expelled in aero-

sols of various magnitudes from coughing or sneezing.<sup>101</sup> The reason for this is not understood altogether but may be associated with the innate intracellular characteristics of viruses. In contrast, bacteria that are primarily extracellular parasites are commonly associated with expelled aerosols from the upper airway.<sup>139</sup>

In a general study of viruses as agents of airborne contagion, it has been demonstrated that large numbers of small particles, 10  $\mu\text{m}$  minimum mean diameter, are produced by sneezes and coughs in nonrhinovirus viral upper respiratory infections and that virus can be recovered from these exhalations. Virus can be recovered from the air of rooms occupied by infected subjects. Small doses of virus are infectious by small particle aerosol. The demonstration of airborne infection with coxsackievirus A type 21 under controlled conditions also was noted.<sup>25</sup>

Hepatitis B virus, for example, is small and can pass through a filter with a pore diameter of 52 nm.<sup>140</sup> The role of particle size in transmission is important; to be effective in airborne transmission, particles should be small, about 10  $\mu\text{m}$  in diameter or less, because small particles will remain suspended in air for periods long enough to permit their dissemination. Particles that are 1-3  $\mu\text{m}$  in diameter will remain suspended almost indefinitely, especially if they are elevated periodically by air currents. Size also affects the amount of virus released by sneezes and coughs, with the greatest concentration being with particles of one  $\mu\text{m}$  or less in diameter. Coughs, sneezes, and other exhalatory activities produce large numbers of small particles that can then serve as vehicles of airborne virus transmission, especially because the small size facilitates wide dissemination. Favero's study, referred to earlier, demonstrated the minimal loss of hepatitis B virus antigenicity in the constant conditions of an ambient environment.<sup>32</sup> The indefinite suspension of hepatitis B virus, along with its antigenic stability, strengthens the position that hepatitis B can be transmitted by airborne spread.

The lack of expelled viral particles may be compensated for by the small number of viral particles needed to cause infection. Thus, even a small number of infectious particles may be enough to initiate clinical infection. An anesthesiologist handling an infected machine might lead to infection of a patient who subsequently receives an anesthetic from that machine. Investigations need to be performed to confirm or refute these possibilities. Until these studies are done, the role of the anesthesia machine in transmitting viral infection will remain in doubt.

#### DISINFECTION AND STERILIZATION OF EQUIPMENT

Table 4 summarizes the more commonly employed disinfectants and their effectiveness in inactivating the

TABLE 4. Probable Sensitivity of Viruses to Various Disinfectants in 10 Minutes at Room Temperature

|                                   | Hepatitis A | Hepatitis B | Herpes Simplex | Varicella | RSV | Influenza | Rhinovirus | Rubella | CJD |
|-----------------------------------|-------------|-------------|----------------|-----------|-----|-----------|------------|---------|-----|
| Nucleic acid type                 | R           | D           | D              | D         | R   | R         | R          | R       | ?   |
| Disinfectant                      |             |             |                |           |     |           |            |         |     |
| Alcohol, ethyl 70%                | +*          | °           | +              | +         | +   | +         | +          | +       | °   |
| Activated glutaraldehyde 2%       | +           | +           | +              | +         | +   | +         | +          | +       | °   |
| Cationic quaternary ammonium 0.1% | °           | °           | +              | +         | +   | +         | °          | +       | °   |
| 10% aqueous formaldehyde          | +           | +           | +              | +         | +   | +         | +          | +       | °   |
| Iodophors 0.05% free iodine       | +           | +           | +              | +         | +   | +         | +          | +       | +   |
| Phenolics                         | °           | °           | +              | +         | +   | +         | °          | +       | +   |
| Sodium hypochlorite 0.1-1%        | +           | +           | +              | +         | +   | +         | +          | +       | +   |

RSV = Respiratory syncytial virus; CJD = Creutzfeldt-Jakob disease; R = Ribonucleic acid; D = Deoxyribonucleic acid.

\* + = yes, ° = no.

viruses we have discussed.<sup>141</sup> The quaternary ammonium compounds and alcohols seem to be less effective overall and probably should not be used. In addition, these compounds have a decreased effectiveness against certain gram-negative bacteria. The only virus that demands more stringent attention is the agent of Creutzfeldt-Jakob disease. One should use 0.5-1.0% sodium hypochlorite (*e.g.*, 10% chlorox) for all disinfecting purposes involving Creutzfeldt-Jakob disease.<sup>115,116,118-120</sup>

With regard to hepatitis, sterilization procedures need to be practiced because the hepatitis virus does not succumb to disinfection. Activated 2% glutaraldehyde has been demonstrated to be an efficient viricidal cold sterilizing agent. It is of relatively low toxicity; has a short sterilization period; has no observable deleterious effects on lensed instruments, metal, and metal thread components; and is effective for at least a 2-week period, during which time it can be reused.<sup>138</sup> In the presence of formaldehyde, the helical structure melts at a relatively low temperature, freeing the amino groups.<sup>142</sup> Autoclaving should be at 15 lb. per square inch at 121° C, boiling should be for at least 20 min, and heating in a sterilizing oven should be done at 180° C for 1 h.<sup>142</sup> Ultraviolet light at 260 nm acts mainly on nucleic acids and is not well suited for viral inactivation because its damage to nucleic acids can be repaired by a variety of enzymatic and genetic mechanisms.<sup>140</sup>

Ethylene oxide and steam sterilization kill all viruses.

#### DISPOSABLE CIRCUITS AND FILTERS

Unless the patient is known to have active hepatitis B infection, the use of disposable circuitry and filters cannot be either advocated or dismissed, with good conscience, because of the lack of scientific evidence. Use

of these devices has been shown not to lessen postoperative bacterial pneumonia in controlled studies.<sup>143-145</sup> Their use even may add a false sense of security, leading to decreased vigilance and increased failure to use more accepted disinfection methods.

#### Personal Protective Measures

Anesthesiologists should recognize that they provide an excellent means of transmission of viruses to patients and should be aware that although they can work through a day, the shedding of viruses from their mucous membranes and skin during viral infection may provide the inoculum to complicate the postoperative period of the patient. Rashes of any kind should be scrutinized before deciding to administer anesthesia. Viruses originating from the airway are more likely to be transmitted to hands and then to patients than by direct droplet transmission. Thorough handwashing is as important in preventing viral transmission as bacterial transmission. The use of gloves protects both patient and anesthesiologist alike. The greatest risk to the anesthesiologist are hepatitis B and herpes simplex infections, and the chance of infection with both can be lessened substantially by wearing gloves. A staff member with any herpes infection should not care for an immunosuppressed patient, a patient who has extensive burns, leukemia, or lymphoma, or patients on protective isolation.

Immunization against influenza, rubella, and now hepatitis are available for the protection of anesthesiologists and their patients. Anesthesiologists should ascertain their rubella titer and be immunized if found susceptible. Preemployment health screening should include a varicella history as well.

If outbreaks of viral infection do occur in the hospital,

anesthesiologists should be among the first to cooperate with isolation policies, mass immunizations, and other necessary measures. Studies on the management of viral outbreaks indicate a consistently low compliance among physicians in presenting themselves for immunization.<sup>109</sup>

Viral infections are a fact of hospital life. Anesthesiologists can play a crucial role in eliminating themselves as links in the transmission of viruses to patients and in so doing, improve their own chances for a long and healthy career.

The authors acknowledge the help of Alida Merrill, Daniel Paterson, and Hildreth Curran in the preparation of this review.

### References

- Hall CB: Nosocomial viral respiratory infection: Perennial weeds on pediatric wards. *Am J Med* 70:670-676, 1981
- Valenti WM, Hall CB, Douglas RG, Menegus MA, Pincus PH: Nosocomial viral infections: I. Epidemiology and significance. *Infect Control* 1:33-37, 1981
- Bagshawd A, Johnson B, Smith D, Gear JHS, Lecatsas G, Prozesky OW: Marburg virus disease—Kenya. *Morbidity and Mortality Weekly Report* 29:145-146, 1980
- du Moulin GC, Paterson DG, Hedley-Whyte J, Lisbon A: Aspiration of gastric bacteria in antacid-treated patients: A frequent cause of post-operative colonisation of the airway. *Lancet* 1:242-245, 1982
- Wenzel RP, Deal EC, Hendley JO: Hospital-acquired viral respiratory illness on a pediatric ward. *Pediatrics* 60:367-371, 1977
- Ramirez-Ronda CH, Fuxench-López Z, Nevárez M: Increased pharyngeal bacterial colonization during viral illness. *Arch Intern Med* 141:1599-1603, 1981
- Deinhardt F: Epidemiology and mode of transmission of viral hepatitis A and B. *Am J Clin Pathol* 65:890-897, 1976
- Denes AE, Smith JL, Maynard JE, Doto IL, Berquist KR, Finkel AJ: Hepatitis B infections in physicians: Results of a nationwide seroepidemiologic survey. *JAMA* 239:210-212, 1978
- Feldman RE, Schiff ER: Hepatitis in dental professionals. *JAMA* 232:1228-1230, 1975
- Francis DP, Maynard JE: The transmission and outcome of hepatitis A, B, and non-A, non-B: A review. *Epidemiol Rev* 1:17-31, 1979
- Gerety RJ: Hepatitis B transmission between dental or medical workers and patients. *Ann Intern Med* 95:229-231, 1981
- Haerem JW, Siebke JC, Ulstrup J, Geiram O, Helle I: HBsAg transmission from a cardiac surgeon incubating Hepatitis B resulting in chronic antigenemia in four patients. *Acta Med Scand* 210:389-392, 1981
- Hardt F, Aldershuile J, Dietrichson O, Juhl E, Nielsen JO, Schlichting P, Skinhoj P, Tage-Jensen U: Hepatitis B virus infection among Danish surgeons. *J Infect Dis* 140:972-974, 1979
- Hirschowitz BI, Dasher CA, Whitt FJ, Cole GW: Hepatitis B antigen and antibody and tests of liver function. A prospective study of 310 hospital laboratory workers. *Am J Clin Pathol* 73:63-68, 1980
- Janzen J, Tripatzis I, Wagner U, Schlieter M, Müller-Dethard E, Wolters E: Epidemiology of hepatitis B surface antigen (HBsAg) and antibody to HBsAg in hospital personnel. *J Infect Dis* 137:261-265, 1978
- Patison CP, Maynard JE, Berquist KR, Webster HM: Epidemiology of hepatitis B in hospital personnel. *Am J Epidemiology* 101:59-64, 1975
- Segal HE, Evans LC, Irwin GA, Callahan MC: Hepatitis B antigen and antibody in the United States Army: Two-year follow-up of health care personnel. *Milit Med* 144:792-795, 1979
- Wands JR, Walker JA, Davis TT, Waterburg LA, Owens AH, Carpenter CCJ: Hepatitis in an oncology unit. *N Engl J Med* 291:1371-1375, 1974
- Snydman DR, Hindman SH, Wineland MD, Bryan JA, Maynard JE: Nosocomial viral hepatitis B. A cluster among staff with subsequent transmission to patients. *Ann Intern Med* 85:573-577, 1976
- Almeida JD, Chisholm GD, Kulatilake AE, et al: Possible airborne spread of serum-hepatitis virus within a haemodialysis unit. *Lancet* 2:849-850, 1971
- Alter HJ: Hepatitis B and the health worker: Prospective studies in perspective. *Ann Intern Med* 85:671-672, 1976
- Maynard JE: Nosocomial viral hepatitis. *Am J Med* 870:439-444, 1981
- Peterson NJ: An assessment of the airborne route in hepatitis B transmission. *Ann NY Acad Sci* 353:157-166, 1980
- Villarejos VM, Visoná KA, Gutiérrez A, Rodríguez A: Role of saliva, urine, and feces in the transmission of Type B hepatitis. *N Engl J Med* 291:1375-1378, 1974
- Knight V: Viruses as agents of airborne contagion. *Ann NY Acad Sci* 353:147-156, 1980
- Carstens J, Macnab GM, Kew MC: Hepatitis B virus infection in anaesthetists. *Br J Anaesth* 49:887-889, 1977
- Green HT, Turner GC: Subtypes of hepatitis B antigen among patients and symptomless carriers. *J Hyg (Camb)* 74:123-131, 1975
- Hollinger FB, Mosley JW, Szmunness W, Aach RD, Peters RL, Stevens C: Transfusion-transmitted viruses study: experimental evidence for two non-A, non-B hepatitis agents. *J Infect Dis* 142:400-407, 1980
- Strunin L: Viral hepatitis. *Br J Anaesth* 51:913-914, 1979
- Zuckerman AJ: Acute viral hepatitis. *J R Coll Physicians Lond* 158:8-94, 1981
- Gocke DJ: New faces of viral hepatitis. *Disease-A-Month*, Chicago, Year Book Medical Publishing, January 1973
- Favero MS, Bond WW, Peterson NJ, Berquist KR, Maynard JE: Detection methods for study of the stability of hepatitis B antigen on surfaces. *J Infect Dis* 129:210-212, 1974
- Levin ML, Maddrey WC, Wands JR, Mendeloff AI: Hepatitis B transmission by dentists. *JAMA* 228:1139-1140, 1974
- Rimland D, Parkin WE, Miller GB, Schrack WD: Hepatitis B outbreak traced to an oral surgeon. *N Engl J Med* 296:953-958, 1977
- Shanson DC: Hepatitis B outbreak in operating theater and intensive care staff. *Lancet* 2:596, 1980
- Waterson AP: Hepatitis B as a hazard in anaesthetic practice. *Br J Anaesth* 48:21-24, 1976
- Aach RD, Kahn RA: Post-transfusion hepatitis: Current perspectives. *Ann Intern Med* 92:539-546, 1980
- Bories P, Coursaget P, Goudeau A, Degott C, Maupas P, Benhamon JP: Antibody to hepatitis B core antigen in chronic active hepatitis. *Br Med J* 1:396-397, 1978
- Hindman SH, Gravelle CR, Murphy BL, Bradley BW, Budge WR, Maynard JE: "e" antigens, Dane particles, and serum DNA polymerase activity in HBsAg carriers. *Am Intern Med* 85:458-460, 1976
- Szmunness W, Stevens CE, Harley EJ, et al: Hepatitis B vaccine. Demonstration of efficacy on a controlled clinical trial in a high-risk population in the United States. *N Engl J Med* 303:833-841, 1980

41. Favero MS, Maynard JE, Leger T, Graham DR, Dixon RE: Guidelines for the care of patient hospitalized with viral hepatitis. *Ann Intern Med* 91:872-876, 1979
42. Grady GF, Lee VA, Prince AM, et al: Hepatitis B immunoglobulin for accidental exposures among medical personnel: Final report of a multicenter controlled trial. *J Infect Dis* 138:625-638, 1978
43. Seeff LB, Hoofnagle JH: Immunoprophylaxis of viral hepatitis. *Gastroenterology* 77:161-182, 1979
44. Seeff LB, Wright EC, Zimmerman HJ, et al: Type B hepatitis after needle-stick exposure: Prevention with hepatitis B immune globulins. *Ann Intern Med* 88:285-293, 1978
45. Szmunn W, Stevens CE, Oleszko WR, Goodman A: Passive-active immunisation against Hepatitis B: Immunogenicity studies in adult Americans. *Lancet* 1:575-577, 1981
46. Crosnier J, Jungers P, Couroucé A, et al: Randomized placebo-controlled trial of hepatitis B surface antigen vaccine in French haemodialysis units: I. Medical staff. *Lancet* 2:455-459, 1981
47. Gerety RJ, Tabor E, Purcell RH, Tyeryar FJ: Summary of an international workshop on Hepatitis B vaccines. *J Infect Dis* 140:642-648, 1979
48. Nahmias AJ, Starr SE: Infections caused by herpes simplex virus, *Infectious Diseases*. Edited by Hoepflich PD. New York, Harper and Row, 1977, pp 726-735
49. Adams G, Stover BH, Keenlyside RA, et al: Nosocomial herpetic infections in a pediatric intensive care unit. *Am J Epidemiol* 113:126-132, 1981
50. Louis DS, Silva J: Herpetic whitlow: Herpetic infections of the digits. *J Hand Surg* 4:90-93, 1979
51. Tuxen DV, Cade JF, McDonald MI, Buchman MRC, Pain MCF: Herpes simplex virus from the lower respiratory tract in adult respiratory distress syndrome. *Am Rev Resp Dis* 125:98, 1982
52. Hirsch MS, Swartz MN: Antiviral agents (first of two parts). *N Engl J Med* 302:903-907, 1980
53. Whitley RJ, Soong SJ, Hirsch MS, et al: Herpes simplex encephalitis: Vidarabine therapy and diagnostic problems. *N Engl J Med* 304:313-318, 1981
54. Saral R, Burns WH, Laskin OL, Santos GW, Lietman PS: Acyclovir prophylaxis of herpes-simplex virus infections. A randomized, double-blind, controlled trial in bone marrow transplant recipients. *N Engl J Med* 305:63-67, 1981
55. Straus SE, Smith HA, Brickman C, de Miranda P, McLaren C, Keeney RE: Acyclovir for chronic mucocutaneous herpes simplex virus infection in immunosuppressed patients. *Ann Intern Med* 96:270-277, 1982
56. Wade JC, Newton B, McLaren C, Flournoy N, Keeney RE, Meyers JD: Intravenous acyclovir to treat mucocutaneous herpes simplex virus infections after marrow transplantation. *Ann Intern Med* 96:265-269, 1982
57. Hirsch MS, Swartz MN: Antiviral agents (second of two parts). *N Engl J Med* 302:949-953, 1980
58. Marcy SM, Kibrick S: Varicella and herpes zoster, *Infectious Diseases*. Edited by Hoepflich PD. New York, Harper and Row, 1977, pp 744-758
59. Leclair JM, Zaia JA, Levin MJ, Congdon RG, Goldmann DA: Airborne transmission of chickenpox in a hospital. *N Engl J Med* 302:450-453, 1980
60. Dudding BA, Wagner SC, Zeller JA, Gmelich JT, French GR, Top FH Jr: Fatal pneumonia associated with adenovirus type 7 in three military trainees. *N Engl J Med* 286:1289-1292, 1972
61. Top FH Jr: Control of adenovirus acute respiratory disease in U. S. Army trainees. *Yale J Biol Med* 48:185-195, 1975
62. Top FH Jr., Dudding BA, Russell PK, Buescher EL: Control of respiratory disease in recruits with types 4 and 7 adenovirus vaccines. *Am J Epidemiol* 94:142-146, 1971
63. Fox JP, Hall CE, Cooney MK: The Seattle virus watch. VII. Observations of adenovirus infections. *Am J Epidemiol* 105:362-386, 1977
64. Barnard DL, Deahart JC, Marmion VJ, Clarke SKR: Outbreak in Bristol of conjunctivitis caused by adenovirus Type B and its epidemiology and control. *Br Med J* 2:165-169, 1973
65. Dawson C, Darrell R: Infections due to adenovirus type 8 in the United States. I. An outbreak of epidemic keratoconjunctivitis originating in a physician's office. *N Engl J Med* 268:1031-1034, 1963
66. Laibson PR, Ortolan G, Dupré-Strachan S: Community and hospital outbreak of epidemic keratoconjunctivitis. *Arch Ophthalmol* 80:467-473, 1968
67. Sprague JB, Hierholzer JC, Currier RW II, Hattwick MAW, Smith MD: Epidemic keratoconjunctivitis. A severe industrial outbreak due to adenovirus type 8. *N Engl J Med* 289:1341-1346, 1973
68. Faden H, Gallagher M, Ogra P, McLoughlin S: Nosocomial outbreak of pharyngoconjunctival fever due to adenovirus type 4. *New York Morbidity and Mortality Report*, 27(7), February 17, 1973
69. Levandowski RA, Rubenis M: Nosocomial conjunctivitis caused by adenovirus type 4. *J Infect Dis* 143:28-31, 1981
70. Hall CB, Geiman JM, Douglas RG, Meagher MP: Control of nosocomial respiratory syncytial viral infections. *Pediatrics* 62:728-732, 1978
71. Berkovich S, Taranko L: Acute respiratory illness in the premature nursery associated with respiratory syncytial virus infections. *Pediatrics* 34:753-760, 1964
72. Ditchburn RK, McQuillin J, Gardner PS, Courts DM: Respiratory syncytial virus in hospital cross-infection. *Br Med J* 2:671-673, 1971
73. Hall CB, Douglas RG, Geiman JM, Messner MK: Nosocomial respiratory syncytial virus infections. *N Engl J Med* 293:1343-1346, 1975
74. Kingston D: Toward the isolation of respiratory syncytial virus from the environment. *J Appl Bacteriol* 31:498-510, 1968
75. Mathur V, Bentley DW, Hall CB: Concurrent respiratory syncytial virus and influenza A infections in the institutionalized elderly and chronically ill. *Ann Intern Med* 93:49-52, 1980
76. Sims DG, Downham APS, Webb JKG, Gardner PS, Weightman D: Hospital cross-infection on children's wards with respiratory syncytial virus and the role of adult carriage. *Acta Paediatr Scand* 64:541-544, 1975
77. Hall CB, Douglas RG, Geiman JM: Possible transmission by fomites of respiratory syncytial virus. *J Infect Dis* 141:98-102, 1980
78. Blumenfeld HL, Kilbourne ED, Louria DB, Rogers DE: Studies on influenza in the pandemic of 1957-1958. I. An epidemiologic, clinical and serologic investigation of an intrahospital epidemic, with a note on vaccination efficacy. *J Clin Invest* 38:199-212, 1959
79. England AC, Pachucki CT, Phillips ML, et al: Influenza A in a hospital—Illinois. *Morbidity and Mortality Weekly Report* 30:79-85, 1981
80. Hall CB, Douglas RG: Nosocomial influenza infection as a cause of intercurrent fevers in infants. *Pediatrics* 55:673-677, 1975
81. Kapila R, Lintz DI, Tecson FT, Ziskin L, Louria DB: A nosocomial outbreak of influenza A. *Chest* 71:576-579, 1977
82. Van Voris CP, Belshe RB, Shaffer JL: Nosocomial influenza B virus infection in the elderly. *Ann Intern Med* 96:153-158, 1982
83. Hoffman DC, Dixon RE: Control of influenza in the hospital. *Ann Intern Med* 87:725-728, 1977
84. Nugent KN, Pesanti E: Tracheobronchial colonization with bacteria during influenza. *Am Rev Respir Dis* 125:173, 1982

85. Hedley-Whyte J, du Moulin GC: The environment of endotracheal tubes: Role of tracheal tubes in the colonization of the upper airway and development of pneumonia. *Proceedings of Workshop on Tracheal Tubes*, HFK 310, Bureau of Medical Devices. Edited by Shupak RC, Deas TC. Silver Spring, Department of Health and Human Services, 1982, pp 91-102
86. Schonberger CB, Bregman DJ, Sullivan-Bolyai JZ, et al: Guillain-Barré syndrome following vaccination in the national influenza immunization program, United States, 1976-1977. *Am J Epidemiol* 110:105-123, 1979
87. Gardner PS, Court SDM, Brocklebank JT, Downham MAPS, Weightman D: Virus cross-infection in paediatric wards. *Br Med J* 1:571-575, 1973
88. Clarke SKR: Parainfluenza virus infections. *Postgrad Med J* 49:792-797, 1973
89. Chanock RM, Parrott RH: Acute respiratory disease in infancy and childhood: Present understanding and prospects for prevention. *Pediatrics* 36:21-39, 1965
90. Glezen WP, Loda FA, Clyde WA Jr, et al: Epidemiologic patterns of acute lower respiratory disease of children in pediatric group practice. *J Pediatr* 78:397-406, 1971
91. Tyrrell DAJ, Bynoe ML: Studies on parainfluenza type 2 and 4 viruses obtained from patients with common colds. *Br Med J* 1:471-474, 1969
92. Hall CE, Brandt CD, Frothingham TE, Spigland I, Cooney MK, Fox JP: The virus watch program: A continuing surveillance of viral infections in metropolitan New York families. IX. A comparison of infections with several respiratory pathogens in New York and New Orleans families. *Am J Epidemiol* 94:367-385, 1971
93. Brown PK, Taylor-Robinson D: Respiratory virus antibodies in sera of persons living in isolated communities. *Bull WHO* 34:895-900, 1966
94. Parrott RH, Vargosko AJ, Kim HW, Bell JA, Chanock RM: Myxoviruses: Parainfluenza. *Am J Public Health* 52:907-917, 1962
95. Harris DJ, Wulff H, Ray CG, Poland JD, Chin TDY, Wenner HA: Viruses and disease. II. An outbreak of parainfluenza type 2 in a children's home. *Am J Epidemiol* 87:419-425, 1968
96. Loda FA, Glezen WP, Clyde WA: Respiratory disease in group day care. *Pediatrics* 49:428-437, 1972
97. Ellis G: Anaesthesia and the common cold. *Anaesthesia* 10:78-79, 1955
98. Tait AR, Narhwold ML, LaBond VA, Knight PR: Anesthesia and upper respiratory viral infections. *ANESTHESIOLOGY* 57:A450, 1982
99. Knight PR, DuBoulay PMH, Bedows E: Anesthesia in influenza virus-infected ferrets. *ANESTHESIOLOGY* 57:A493, 1982
100. Gwaltney JM, Moskalski PB, Hendley JO: Hand to hand transmission of rhinovirus colds. *Ann Intern Med* 88:463-467, 1978
101. Hendley JO, Wenzel RP, Gwaltney JM: Transmission of rhinovirus colds by self-inoculation. *N Engl J Med* 288:1361-1364, 1973
102. Reed SE: An investigation of the possible transmission of rhinovirus colds through indirect contact. *J Hyg (Camb)* 75:249-258, 1975
103. Gwaltney JM, Moskalski PB, Hendley JO: Interruption of experimental rhinovirus transmission. *J Infect Dis* 142:811-815, 1980
104. Carne S, Dewhurst CJ, Hurley R: Rubella epidemic in a maternity unit. *Br Med J* 1:444-446, 1973
105. Edell TA, Howard C, Ferguson SW, Harrel B, Connor J: Rubella in hospital personnel and patients—Colorado. *Morbidity and Mortality Weekly Report* 28:325-327, 1979
106. Johnson G, Norberg W, Miller R, et al: Nosocomial rubella infection—North Dakota, Alabama, Ohio. *Morbidity and Mortality Weekly Report* 29:629-631, 1981
107. McLaughlin MC, Gold LH: The New York rubella incident: A case for changing hospital policy regarding rubella testing and immunization. *Am J Public Health* 69:287-289, 1979
108. Polk BF, White JA, DeGirolami PC, Modlin JF: An outbreak of rubella among hospital personnel. *N Engl J Med* 303:541-545, 1980
109. Immunization Practices Advisory Committee—Rubella Prevention. *Morbidity and Mortality Weekly Report* 30:37-47, 1981
110. Orenstein A, Heseltine PNR, LeGagnoux SJ, Portnoy B: Rubella vaccine and susceptible hospital employees. Poor physician participation. *JAMA* 245:711-713, 1981
111. Brown P: An epidemiological critique of Creutzfeldt-Jakob disease. *Epidemiol Rev* 2:113-135, 1980
112. Masters CL, Harris JO, Gajusek C, Gibbs DJ, Bernoulli C, Asher DM: Creutzfeldt-Jakob disease: Patterns of worldwide occurrence and the significance of familial and sporadic clustering. *Ann Neurol* 5:177-188, 1979
113. Matthews WB: Slow virus infection. *JR Coll Physicians Lond* 15:109-112, 1981
114. Schoene WC, Masters CL, Gibbs CJ, et al: Transmissible spongiform encephalopathy (Creutzfeldt-Jakob disease). Atypical and pathological findings. *Arch Neurol* 38:473-477, 1981
115. Bernoulli C, Siegfried J, Baumgartner G, Regli F, Rabinowicz T, Gajusek DC, Gibbs CJ: Danger of accidental person to person transmission of Creutzfeldt-Jakob disease by surgery. *Lancet* 1:478-479, 1977
116. Duffy P, Wolf J, Collins G, DeVoe AG, Streeten B, Cowen D: Possible person to person transmission of Creutzfeldt-Jakob disease. *N Engl J Med* 290:692-693, 1974
117. Corsellis JAN: On the transmission of dementia. A personal view of the slow virus problem. *Br J Psychiatry* 134:553-559, 1979
118. Gibbs CJ, Amyx HL, Bacote A, Masters CL, Gajusek DC: Oral transmission of Kuru, Creutzfeldt-Jakob disease, and Scrapie to nonhuman primates. *J Infect Dis* 142:205-208, 1980
119. Brown P, Gibbs CJ, Amyx HL, et al: Chemical disinfection of Creutzfeldt-Jakob disease virus. *N Engl J Med* 306:1279-1282, 1982
120. Gajusek DC, Gibbs CJ, Asher DM, et al: Precautions in medical care of, and in handling materials from, patients with transmissible virus dementia (Creutzfeldt-Jakob disease). *N Engl J Med* 297:1253-1258, 1977
121. Fekety R: Prevention and treatment of viral infections—Problems and current recommendations. *Postgrad Med* 69:133-141, 1981
122. Valenti WM, Betts RF, Hall CB, Hruska JF, Douglas RG: Nosocomial viral infections: II. Guidelines for prevention and control of respiratory viruses, herpesviruses, and hepatitis viruses. *Infect Control* 1:165-178, 1980
123. Humphrey LJ, Wingard DW, Lang R: The effect of surgery and anesthesia on the immunologic responsiveness of the rat. *Surgery* 65:946-951, 1969
124. Goldstein E, Munsen ES, Eagle C, Martucci RW, Hoepflich PD: The effects of anesthetic agents on murine pulmonary bactericidal activity. *ANESTHESIOLOGY* 34:344-351, 1971
125. Humphrey LJ, Wingard DW, Lang R: Effect of halothane on spleen cells: In vitro studies on reversibility of immunosuppression. *Surgery* 65:939-942, 1969
126. Skillman JJ, Bushnell LS, Hedley-Whyte J: Peritonitis and respiratory failure after abdominal operations. *Ann Surg* 170:122-127, 1969
127. Moudgil GC: Influence of halothane on mortality from murine hepatitis virus (MHV<sub>3</sub>). *Br J Anaesth* 45:1236, 1973

128. Donovan CA: The influence of diethyl ether inhalation on experimental canine distemper. *Veterinary Medicine—Small Animal Clinic* 63:345–347, 1968
129. Sulkin SE, Zarafonitis C: Influence of anesthesia on experimental neurotropic virus infections. II. In vitro studies with the viruses of western and eastern equine encephalomyelitis, St. Louis encephalitis, poliomyelitis (Lansing), and rabies. *J Exp Med* 85:559–569, 1947
130. Bedows E, Knight PR: Defective virus RNA in halothane exposed cells. *ANESTHESIOLOGY* 63:S62, 1980
131. Bedows E, Knight PR: Antiviral activity of halothane. *Abstr Ann Meeting Am Soc Microbiol A16*, Washington DC 1982
132. Knight PR, Davidson B, Nahrwold ML: Human virus replication during halothane exposure. *ANESTHESIOLOGY* 53:S348, 1980
133. Knight PR, Nahrwold ML, Bedows E: Anesthetic action and virus replication: Inhibition of measles virus replication in cells exposed to halothane. *Antimicrob Agents Chemother* 17:890–896, 1980
134. Knight PR, Bedows E, Nahrwold ML, Maassab HF, Smitka CW, Busch MT: Alterations in influenza virus pulmonary pathology induced by diethyl ether, halothane, enflurane, and pentobarbital anesthesia in mice. *ANESTHESIOLOGY* 58:209–215, 1981
135. Blaese RM, Hofstrand H: Evaluation of transfer factor in the therapy of SSPE, cellular immunity and SSPE. *Arch Neurol* 32:494–495, 1975
136. Huang A, Baltimore D: Defective viral particles and viral disease processes. *Nature (London)* 226:325–327, 1970
137. Vandvik B, Froland SS, Hoyeraal HM, Stien R, Degre M: Immunological features in a case of subacute sclerosing panencephalitis treated with transfer factor. *Scand J Immunol* 2:367–374, 1973
138. Dunham WB: *Virucidal Agents, Antiseptics, Disinfectants, Fungicides, and Chemical and Physical Sterilization*. Edited by Reddish GF. Philadelphia, Lea and Febiger, 1957, pp 432–456
139. Duguid JP: Expulsion of pathogenic organisms from the respiratory tract. *Br Med J* 1:265–268, 1946
140. Robinson WS, Greenberg H: *Hepatitis B, Infectious Diseases*. Edited by Hoepflich PD. New York, Harper and Row, 1977, pp 609–617
141. Prince HN: Disinfectant activity against bacteria and viruses: A hospital guide. *Particulate and Microbial Control* 2:55–62, 1983
142. Davis BD, Dulbecco R: *Sterilization and disinfection, Microbiology*. Edited by Davis BD, Dulbecco R, Eisen HN, Ginsburg HS. New York, Harper and Row, 1980, pp 1264–1272
143. du Moulin GC, Sauberman AJ: The anesthesia machine and circle system are not likely to be sources of bacterial contamination. *ANESTHESIOLOGY* 47:353–358, 1977
144. Feeley TW, Hamilton WK, Xavier B, Moyers J, Eger EI: Sterile anesthesia breathing circuits do not prevent postoperative pulmonary infection. *ANESTHESIOLOGY* 54:369–372, 1981
145. Garibaldi RA, Britt MR, Webster C: Failure of bacterial filters to reduce the incidence of pneumonia after inhalation anesthesia. *ANESTHESIOLOGY* 54:364–368, 1981
